# Supplementary material for: Characteristics of the Protein Complexes and Pores Formed by Bacillus cereus Hemolysin BL
Source: PubMed Central journal article supplement (PMC7694065; doi:10.3390/toxins12110672), 2020-10-24
Supplement: toxins-12-00672-s001.pdf [file toxins-12-00672-s001.pdf]

# Supplementary Materials: Characteristics of the Protein Complexes and Pores Formed by *Bacillus cereus* Hemolysin BL

Nadja Jessberger, Richard Dietrich, Kristina Schauer, Stefanie Schwemmer, Erwin Märtlbauer and Roland Benz

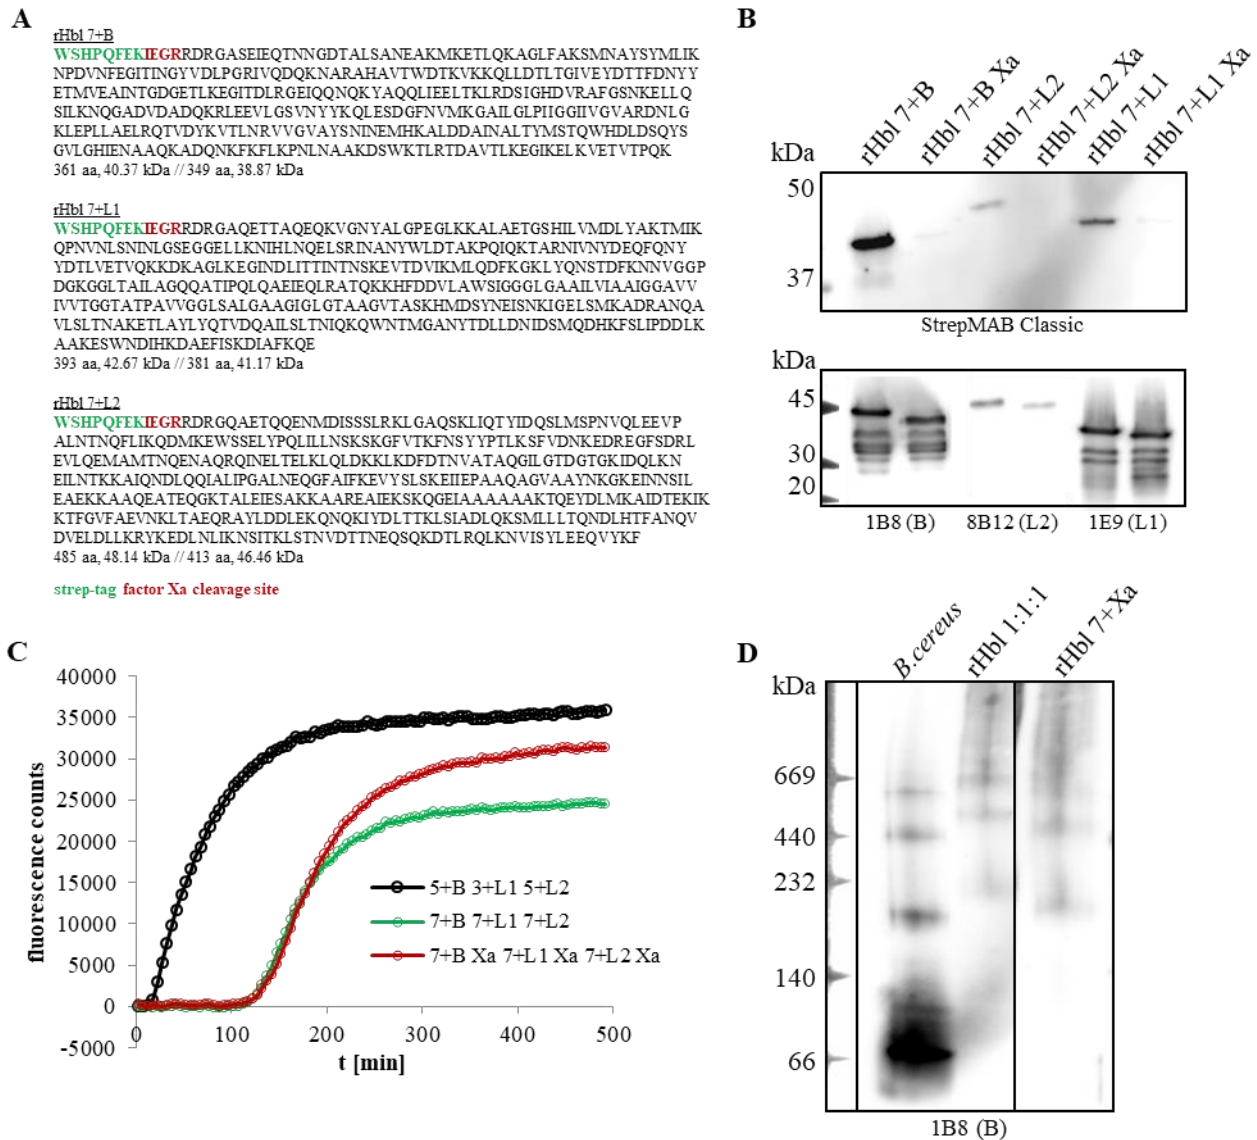

**Figure S1.** Properties of the rHbl components overexpressed using the pASK-IBA 7+ system. (A) Sequences of the proteins including strep-tag (green) and factor Xa cleavage site (red). (B) Cleavage of the tags shown in Western blots using tag-specific StrepMAB Classic and Hbl-specific mAbs. (C) Pore-forming activity of the cleaved proteins. (D) Complex formation of the cleaved proteins. rHbl 1:1:1 = concentration ratio of the proteins 5+B, 3+L1 and 5+L2 [26]. 7+Xa = newly generated, cleaved rHbl proteins (this study).

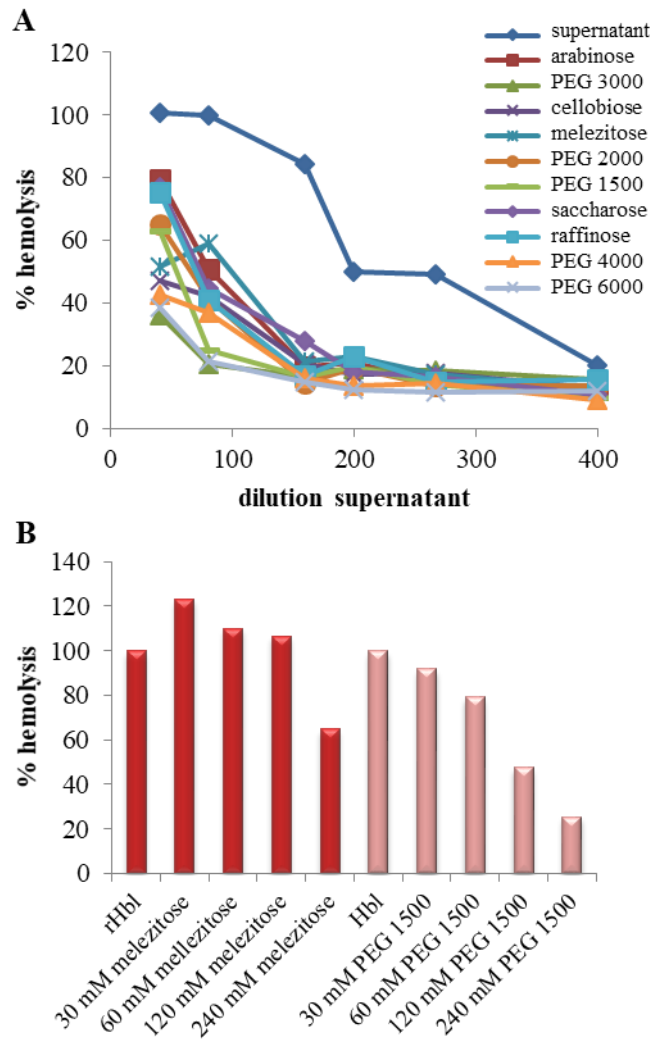

**Figure S2.** Results of hemolysis assays with defibrinated sheep blood. **(A)** Dilution series of *B. cereus* F837/76  $\Delta nheABC$  supernatant under addition of 30 mM non-electrolytes. **(B)** Hemolysis of rHbl (1.5 pmol/ $\mu$ l each) under addition of rising concentrations of melezitose and PEG 1500.

**Table S1.** Results of LC-MS analyses. Excised bands from Coomassie-stained native gels were in-gel digested with trypsin and extracted before NanoLC-MS/MS analyses. Data were compared to UniProt *Bacillus cereus* Reference Proteome database (UP000001417), and the sequences of the Hbl proteins of *B. cereus* strain F837/76. Results are sorted according to their number of significant matches. All results with number of significant matches >5 and number of significant sequences >4 are shown. emPAI: exponentially modified protein abundance index.

| 1. <i>B. cereus</i> supernatant 700 kDa complex |        |                        |       |        |                             |                               |       |                                                                                                                                                                              |
|-------------------------------------------------|--------|------------------------|-------|--------|-----------------------------|-------------------------------|-------|------------------------------------------------------------------------------------------------------------------------------------------------------------------------------|
| Family                                          | Member | Accession              | Score | Mass   | Num. of Significant Matches | Num. of Significant Sequences | emPAI | Description                                                                                                                                                                  |
| 3                                               | 1      | tr Q81I63 Q81I63_BACCR | 246   | 109042 | 19                          | 16                            | 0.93  | Microbial collagenase OS= <i>Bacillus cereus</i> (strain ATCC 14579 / DSM 31 / JCM 2152 / NBRC 15305 / NCIMB 9373 / NRRL B-3711) OX=226900 GN=BC_0556 PE=4 SV=1              |
| 1                                               | 1      | Hbl_B                  | 271   | 37838  | 18                          | 10                            | 3.24  | Hbl_B                                                                                                                                                                        |
| 6                                               | 1      | tr Q81EI5 Q81EI5_BACCR | 131   | 43776  | 17                          | 10                            | 1.88  | Putative murein endopeptidase OS= <i>Bacillus cereus</i> (strain ATCC 14579 / DSM 31 / JCM 2152 / NBRC 15305 / NCIMB 9373 / NRRL B-3711) OX=226900 GN=BC_1991 PE=4 SV=1      |
| 4                                               | 1      | tr Q815G3 Q815G3_BACCR | 163   | 47551  | 9                           | 7                             | 1.03  | N-acetylmuramoyl-L-alanine amidase OS= <i>Bacillus cereus</i> (strain ATCC 14579 / DSM 31 / JCM 2152 / NBRC 15305 / NCIMB 9373 / NRRL B-3711) OX=226900 GN=BC_5196 PE=4 SV=1 |
| 11                                              | 1      | sp Q815K8 ENO_BACCR    | 101   | 46343  | 9                           | 7                             | 1.07  | Enolase OS= <i>Bacillus cereus</i> (strain ATCC 14579 / DSM 31 / JCM 2152 / NBRC 15305 / NCIMB 9373 / NRRL B-3711) OX=226900 GN=eno PE=3 SV=1                                |
| 14                                              | 1      | Hbl_L1                 | 92    | 40669  | 8                           | 7                             | 1.06  | Hbl_L1                                                                                                                                                                       |
| 8                                               | 1      | tr Q81EL6 Q81EL6_BACCR | 123   | 44980  | 7                           | 7                             | 0.93  | Enterotoxin OS= <i>Bacillus cereus</i> (strain ATCC 14579 / DSM 31 / JCM 2152 / NBRC 15305 / NCIMB 9373 / NRRL B-3711) OX=226900 GN=BC_1953 PE=4 SV=1                        |
| 17                                              | 1      | tr Q815D0 Q815D0_BACCR | 79    | 60788  | 7                           | 7                             | 0.63  | N-acetylmuramoyl-L-alanine amidase OS= <i>Bacillus cereus</i> (strain ATCC 14579 / DSM 31 / JCM 2152 / NBRC 15305 / NCIMB 9373 / NRRL B-3711) OX=226900 GN=BC_5234 PE=4 SV=1 |
| 9                                               | 1      | tr Q81HW1 Q81HW1_BACCR | 118   | 32367  | 6                           | 3                             | 0.47  | Phospholipase C OS= <i>Bacillus cereus</i> (strain ATCC 14579 / DSM 31 / JCM 2152 / NBRC 15305 / NCIMB 9373 / NRRL B-3711) OX=226900 GN=BC_0670 PE=4 SV=1                    |

| 10                                                     | 1      | tr Q81HW5 <br>Q81HW5_BA<br>CCR | 102   | 87818  | 6                                 | 6                                   | 0.33  | Immune inhibitor A OS= <i>Bacillus cereus</i> (strain ATCC 14579 / DSM 31 / JCM 2152 / NBRC 15305 / NCIMB 9373 / NRRL B-3711) OX=226900 GN=BC_0666 PE=4 SV=1                 |
|--------------------------------------------------------|--------|--------------------------------|-------|--------|-----------------------------------|-------------------------------------|-------|------------------------------------------------------------------------------------------------------------------------------------------------------------------------------|
| 20                                                     | 1      | Hbl_L2                         | 69    | 46140  | 6                                 | 6                                   | 0.73  | Hbl_L2                                                                                                                                                                       |
| 18                                                     | 1      | tr Q815P0 Q<br>815P0_BACC<br>R | 72    | 56561  | 5                                 | 5                                   | 0.45  | Thiol-activated cytolysin OS= <i>Bacillus cereus</i> (strain ATCC 14579 / DSM 31 / JCM 2152 / NBRC 15305 / NCIMB 9373 / NRRL B-3711) OX=226900 GN=BC_5101 PE=3 SV=1          |
| <b>2. <i>B. cereus</i> supernatant 600 kDa complex</b> |        |                                |       |        |                                   |                                     |       |                                                                                                                                                                              |
| Family                                                 | Member | Accession                      | Score | Mass   | Num. of<br>Significant<br>Matches | Num. of<br>Significant<br>Sequences | emPAI | Description                                                                                                                                                                  |
| 1                                                      | 1      | Hbl_B                          | 326   | 37838  | 27                                | 18                                  | 9.3   | Hbl_B                                                                                                                                                                        |
| 3                                                      | 1      | tr Q81I63 Q8<br>1I63_BACCR     | 213   | 109042 | 18                                | 11                                  | 0.59  | Microbial collagenase OS= <i>Bacillus cereus</i> (strain ATCC 14579 / DSM 31 / JCM 2152 / NBRC 15305 / NCIMB 9373 / NRRL B-3711) OX=226900 GN=BC_0556 PE=4 SV=1              |
| 6                                                      | 1      | Hbl_L2                         | 191   | 46140  | 18                                | 15                                  | 3.3   | Hbl_L2                                                                                                                                                                       |
| 9                                                      | 1      | tr Q815G3 Q<br>815G3_BACC<br>R | 148   | 47551  | 15                                | 14                                  | 2.46  | N-acetylmuramoyl-L-alanine amidase OS= <i>Bacillus cereus</i> (strain ATCC 14579 / DSM 31 / JCM 2152 / NBRC 15305 / NCIMB 9373 / NRRL B-3711) OX=226900 GN=BC_5196 PE=4 SV=1 |
| 11                                                     | 1      | tr Q81BE4 Q<br>81BE4_BACC<br>R | 134   | 43361  | 15                                | 11                                  | 2.2   | Surface protein OS= <i>Bacillus cereus</i> (strain ATCC 14579 / DSM 31 / JCM 2152 / NBRC 15305 / NCIMB 9373 / NRRL B-3711) OX=226900 GN=BC_3221 PE=4 SV=1                    |
| 5                                                      | 1      | Hbl_L1                         | 197   | 40669  | 14                                | 12                                  | 3.26  | Hbl_L1                                                                                                                                                                       |
| 10                                                     | 1      | tr Q815P0 Q<br>815P0_BACC<br>R | 142   | 56561  | 12                                | 11                                  | 1.44  | Thiol-activated cytolysin OS= <i>Bacillus cereus</i> (strain ATCC 14579 / DSM 31 / JCM 2152 / NBRC 15305 / NCIMB 9373 / NRRL B-3711) OX=226900 GN=BC_5101 PE=3 SV=1          |
| 12                                                     | 1      | tr Q81HW1 <br>Q81HW1_BA<br>CCR | 115   | 32367  | 11                                | 9                                   | 2.65  | Phospholipase C OS= <i>Bacillus cereus</i> (strain ATCC 14579 / DSM 31 / JCM 2152 / NBRC 15305 / NCIMB 9373 / NRRL B-3711) OX=226900 GN=BC_0670 PE=4 SV=1                    |
| 8                                                      | 1      | tr Q815D0 Q<br>815D0_BACC<br>R | 153   | 60788  | 7                                 | 6                                   | 0.52  | N-acetylmuramoyl-L-alanine amidase OS= <i>Bacillus cereus</i> (strain ATCC 14579 / DSM 31 / JCM 2152 / NBRC                                                                  |

|                                                        |        |                        |       |       |                             |                               |       | 15305 / NCIMB 9373 / NRRL B-3711) OX=226900<br>GN=BC_5234 PE=4 SV=1                                                                                                      |
|--------------------------------------------------------|--------|------------------------|-------|-------|-----------------------------|-------------------------------|-------|--------------------------------------------------------------------------------------------------------------------------------------------------------------------------|
| 13                                                     | 1      | tr Q81A83 Q81A83_BACCR | 95    | 36228 | 7                           | 4                             | 0.59  | Antigen OS= <i>Bacillus cereus</i> (strain ATCC 14579 / DSM 31 / JCM 2152 / NBRC 15305 / NCIMB 9373 / NRRL B-3711) OX=226900 GN=BC_3699 PE=4 SV=1                        |
| 17                                                     | 1      | tr Q81CL9 Q81CL9_BACCR | 81    | 62481 | 6                           | 5                             | 0.4   | Bacillolysin OS= <i>Bacillus cereus</i> (strain ATCC 14579 / DSM 31 / JCM 2152 / NBRC 15305 / NCIMB 9373 / NRRL B-3711) OX=226900 GN=BC_2735 PE=4 SV=1                   |
| 23                                                     | 1      | tr Q81EI5 Q81EI5_BACCR | 51    | 43776 | 6                           | 6                             | 0.78  | Putative murein endopeptidase OS= <i>Bacillus cereus</i> (strain ATCC 14579 / DSM 31 / JCM 2152 / NBRC 15305 / NCIMB 9373 / NRRL B-3711) OX=226900 GN=BC_1991 PE=4 SV=1  |
| 1                                                      | 2      | tr Q7BYC7 Q7BYC7_BACCR | 39    | 52307 | 6                           | 5                             | 0.5   | Hemolysin BL binding component OS= <i>Bacillus cereus</i> (strain ATCC 14579 / DSM 31 / JCM 2152 / NBRC 15305 / NCIMB 9373 / NRRL B-3711) OX=226900 GN=BC_3101 PE=4 SV=1 |
| 14                                                     | 1      | sp Q815K8 ENO_BACCR    | 95    | 46343 | 5                           | 5                             | 0.57  | Enolase OS= <i>Bacillus cereus</i> (strain ATCC 14579 / DSM 31 / JCM 2152 / NBRC 15305 / NCIMB 9373 / NRRL B-3711) OX=226900 GN=eno PE=3 SV=1                            |
| 16                                                     | 1      | sp Q814B0 CH60_BACCR   | 82    | 57396 | 5                           | 5                             | 0.44  | 60 kDa chaperonin OS= <i>Bacillus cereus</i> (strain ATCC 14579 / DSM 31 / JCM 2152 / NBRC 15305 / NCIMB 9373 / NRRL B-3711) OX=226900 GN=groL PE=3 SV=1                 |
| 20                                                     | 1      | tr Q81EL6 Q81EL6_BACCR | 68    | 44980 | 5                           | 4                             | 0.6   | Enterotoxin OS= <i>Bacillus cereus</i> (strain ATCC 14579 / DSM 31 / JCM 2152 / NBRC 15305 / NCIMB 9373 / NRRL B-3711) OX=226900 GN=BC_1953 PE=4 SV=1                    |
| <b>3. <i>B. cereus</i> supernatant 440 kDa complex</b> |        |                        |       |       |                             |                               |       |                                                                                                                                                                          |
| Family                                                 | Member | Accession              | Score | Mass  | Num. of Significant Matches | Num. of Significant Sequences | emPAI | Description                                                                                                                                                              |
| 1                                                      | 1      | Hbl_B                  | 303   | 37838 | 57                          | 24                            | 21.42 | Hbl_B                                                                                                                                                                    |
| 2                                                      | 1      | tr Q815P0 Q815P0_BACCR | 197   | 56561 | 40                          | 24                            | 7.68  | Thiol-activated cytolysin OS= <i>Bacillus cereus</i> (strain ATCC 14579 / DSM 31 / JCM 2152 / NBRC 15305 / NCIMB 9373 / NRRL B-3711) OX=226900 GN=BC_5101 PE=3 SV=1      |

|    |   |                        |     |        |    |    |      |                                                                                                                                                                              |
|----|---|------------------------|-----|--------|----|----|------|------------------------------------------------------------------------------------------------------------------------------------------------------------------------------|
| 4  | 1 | tr Q81I63 Q81I63_BACCR | 179 | 109042 | 35 | 21 | 1.35 | Microbial collagenase OS= <i>Bacillus cereus</i> (strain ATCC 14579 / DSM 31 / JCM 2152 / NBRC 15305 / NCIMB 9373 / NRRL B-3711) OX=226900 GN=BC_0556 PE=4 SV=1              |
| 3  | 1 | tr Q81BE4 Q81BE4_BACCR | 187 | 43361  | 33 | 22 | 10.3 | Surface protein OS= <i>Bacillus cereus</i> (strain ATCC 14579 / DSM 31 / JCM 2152 / NBRC 15305 / NCIMB 9373 / NRRL B-3711) OX=226900 GN=BC_3221 PE=4 SV=1                    |
| 6  | 1 | tr Q815G3 Q815G3_BACCR | 159 | 47551  | 27 | 18 | 4.89 | N-acetylmuramoyl-L-alanine amidase OS= <i>Bacillus cereus</i> (strain ATCC 14579 / DSM 31 / JCM 2152 / NBRC 15305 / NCIMB 9373 / NRRL B-3711) OX=226900 GN=BC_5196 PE=4 SV=1 |
| 7  | 1 | tr Q81HW1 Q81HW1_BACCR | 131 | 32367  | 23 | 12 | 5.13 | Phospholipase C OS= <i>Bacillus cereus</i> (strain ATCC 14579 / DSM 31 / JCM 2152 / NBRC 15305 / NCIMB 9373 / NRRL B-3711) OX=226900 GN=BC_0670 PE=4 SV=1                    |
| 10 | 1 | Hbl_L1                 | 113 | 40669  | 22 | 17 | 4.81 | Hbl_L1                                                                                                                                                                       |
| 9  | 1 | Hbl_L2                 | 118 | 46140  | 20 | 17 | 3.71 | Hbl_L2                                                                                                                                                                       |
| 11 | 1 | sp Q815K8 ENO_BACCR    | 94  | 46343  | 13 | 12 | 1.97 | Enolase OS= <i>Bacillus cereus</i> (strain ATCC 14579 / DSM 31 / JCM 2152 / NBRC 15305 / NCIMB 9373 / NRRL B-3711) OX=226900 GN=eno PE=3 SV=1                                |
| 12 | 1 | tr Q81HW5 Q81HW5_BACCR | 84  | 87818  | 13 | 11 | 0.7  | Immune inhibitor A OS= <i>Bacillus cereus</i> (strain ATCC 14579 / DSM 31 / JCM 2152 / NBRC 15305 / NCIMB 9373 / NRRL B-3711) OX=226900 GN=BC_0666 PE=4 SV=1                 |
| 16 | 1 | tr Q81CL9 Q81CL9_BACCR | 64  | 62481  | 12 | 12 | 1.25 | Bacillolysin OS= <i>Bacillus cereus</i> (strain ATCC 14579 / DSM 31 / JCM 2152 / NBRC 15305 / NCIMB 9373 / NRRL B-3711) OX=226900 GN=BC_2735 PE=4 SV=1                       |
| 13 | 1 | tr Q81HV2 Q81HV2_BACCR | 72  | 47290  | 11 | 10 | 1.44 | Cell wall-binding protein OS= <i>Bacillus cereus</i> (strain ATCC 14579 / DSM 31 / JCM 2152 / NBRC 15305 / NCIMB 9373 / NRRL B-3711) OX=226900 GN=BC_0679 PE=4 SV=1          |
| 1  | 2 | tr Q7BYC7 Q7BYC7_BACCR | 61  | 52307  | 11 | 7  | 0.76 | Hemolysin BL binding component OS= <i>Bacillus cereus</i> (strain ATCC 14579 / DSM 31 / JCM 2152 / NBRC 15305 / NCIMB 9373 / NRRL B-3711) OX=226900 GN=BC_3101 PE=4 SV=1     |
| 14 | 1 | tr Q815D0 Q815D0_BACCR | 67  | 60788  | 9  | 8  | 0.74 | N-acetylmuramoyl-L-alanine amidase OS= <i>Bacillus cereus</i> (strain ATCC 14579 / DSM 31 / JCM 2152 / NBRC                                                                  |

|    |   |                        |    |       |   |   |      |                                                                                                                                                                                   |
|----|---|------------------------|----|-------|---|---|------|-----------------------------------------------------------------------------------------------------------------------------------------------------------------------------------|
|    |   |                        |    |       |   |   |      | 15305 / NCIMB 9373 / NRRL B-3711) OX=226900<br>GN=BC_5234 PE=4 SV=1                                                                                                               |
| 15 | 1 | tr Q81EL6 Q81EL6_BACCR | 64 | 44980 | 9 | 7 | 1.12 | Enterotoxin OS= <i>Bacillus cereus</i> (strain ATCC 14579 / DSM 31 / JCM 2152 / NBRC 15305 / NCIMB 9373 / NRRL B-3711) OX=226900 GN=BC_1953 PE=4 SV=1                             |
| 21 | 1 | tr Q81EI5 Q81EI5_BACCR | 45 | 43776 | 8 | 7 | 1.16 | Putative murein endopeptidase OS= <i>Bacillus cereus</i> (strain ATCC 14579 / DSM 31 / JCM 2152 / NBRC 15305 / NCIMB 9373 / NRRL B-3711) OX=226900 GN=BC_1991 PE=4 SV=1           |
| 17 | 1 | tr Q81GL0 Q81GL0_BACCR | 48 | 61955 | 7 | 7 | 0.61 | Oligopeptide-binding protein oppA OS= <i>Bacillus cereus</i> (strain ATCC 14579 / DSM 31 / JCM 2152 / NBRC 15305 / NCIMB 9373 / NRRL B-3711) OX=226900 GN=BC_1185 PE=4 SV=1       |
| 24 | 1 | tr Q81A83 Q81A83_BACCR | 42 | 36228 | 7 | 4 | 0.79 | Antigen OS= <i>Bacillus cereus</i> (strain ATCC 14579 / DSM 31 / JCM 2152 / NBRC 15305 / NCIMB 9373 / NRRL B-3711) OX=226900 GN=BC_3699 PE=4 SV=1                                 |
| 13 | 2 | tr Q81HJ4 Q81HJ4_BACCR | 50 | 45574 | 5 | 4 | 0.45 | Enterotoxin / cell-wall binding protein OS= <i>Bacillus cereus</i> (strain ATCC 14579 / DSM 31 / JCM 2152 / NBRC 15305 / NCIMB 9373 / NRRL B-3711) OX=226900 GN=BC_0813 PE=4 SV=1 |

#### 7. *B. cereus* supernatant 120 kDa complex

| Family | Member | Accession              | Score | Mass   | Num. of Significant Matches | Num. of Significant Sequences | emPAI  | Description                                                                                                                                                     |
|--------|--------|------------------------|-------|--------|-----------------------------|-------------------------------|--------|-----------------------------------------------------------------------------------------------------------------------------------------------------------------|
| 1      | 1      | tr Q81I63 Q81I63_BACCR | 4512  | 109042 | 200                         | 45                            | 6.76   | Microbial collagenase OS= <i>Bacillus cereus</i> (strain ATCC 14579 / DSM 31 / JCM 2152 / NBRC 15305 / NCIMB 9373 / NRRL B-3711) OX=226900 GN=BC_0556 PE=4 SV=1 |
| 2      | 1      | Hbl_L2                 | 3731  | 46140  | 121                         | 52                            | 215.03 | Hbl_L2                                                                                                                                                          |
| 3      | 1      | Hbl_L1                 | 2304  | 40669  | 85                          | 33                            | 63.04  | Hbl_L1                                                                                                                                                          |
| 4      | 1      | tr Q81BE4 Q81BE4_BACCR | 1782  | 43361  | 78                          | 48                            | 97.44  | Surface protein OS= <i>Bacillus cereus</i> (strain ATCC 14579 / DSM 31 / JCM 2152 / NBRC 15305 / NCIMB 9373 / NRRL B-3711) OX=226900 GN=BC_3221 PE=4 SV=1       |
| 3      | 2      | tr Q7BYC6 Q7BYC6_BACCR | 1638  | 43804  | 61                          | 30                            | 17.44  | Hemolysin BL lytic component L1 OS= <i>Bacillus cereus</i> (strain ATCC 14579 / DSM 31 / JCM 2152 / NBRC 15305)                                                 |

|    |   |                                |      |       |    |    |       |                                                                                                                                                                                                   |
|----|---|--------------------------------|------|-------|----|----|-------|---------------------------------------------------------------------------------------------------------------------------------------------------------------------------------------------------|
|    |   |                                |      |       |    |    |       | / NCIMB 9373 / NRRL B-3711) OX=226900 GN=BC_3103<br>PE=4 SV=1                                                                                                                                     |
| 5  | 1 | tr Q81HW0 <br>Q81HW0_BA<br>CCR | 1572 | 36900 | 58 | 12 | 2.39  | Sphingomyelin phosphodiesterase OS= <i>Bacillus cereus</i><br>(strain ATCC 14579 / DSM 31 / JCM 2152 / NBRC 15305<br>/ NCIMB 9373 / NRRL B-3711) OX=226900 GN=BC_0671<br>PE=4 SV=1                |
| 6  | 1 | tr Q815P0 Q<br>815P0_BACC<br>R | 1486 | 56561 | 54 | 32 | 11.55 | Thiol-activated cytolysin OS= <i>Bacillus cereus</i> (strain<br>ATCC 14579 / DSM 31 / JCM 2152 / NBRC 15305 /<br>NCIMB 9373 / NRRL B-3711) OX=226900 GN=BC_5101<br>PE=3 SV=1                      |
| 7  | 1 | tr Q81HW5 <br>Q81HW5_BA<br>CCR | 1083 | 87818 | 45 | 26 | 2.64  | Immune inhibitor A OS= <i>Bacillus cereus</i> (strain ATCC<br>14579 / DSM 31 / JCM 2152 / NBRC 15305 / NCIMB 9373<br>/ NRRL B-3711) OX=226900 GN=BC_0666 PE=4 SV=1                                |
| 8  | 1 | Hbl_B                          | 917  | 37838 | 42 | 23 | 13.53 | Hbl_B                                                                                                                                                                                             |
| 10 | 1 | tr Q81EI5 Q8<br>1EI5_BACCR     | 597  | 43776 | 40 | 15 | 6.87  | Putative murein endopeptidase OS= <i>Bacillus cereus</i><br>(strain ATCC 14579 / DSM 31 / JCM 2152 / NBRC 15305<br>/ NCIMB 9373 / NRRL B-3711) OX=226900 GN=BC_1991<br>PE=4 SV=1                  |
| 11 | 2 | tr Q81HV2 Q<br>81HV2_BAC<br>CR | 519  | 47290 | 29 | 19 | 5.23  | Cell wall-binding protein OS= <i>Bacillus cereus</i> (strain<br>ATCC 14579 / DSM 31 / JCM 2152 / NBRC 15305 /<br>NCIMB 9373 / NRRL B-3711) OX=226900 GN=BC_0679<br>PE=4 SV=1                      |
| 9  | 1 | tr Q81EL6 Q<br>81EL6_BACC<br>R | 734  | 44980 | 27 | 13 | 2.22  | Enterotoxin OS= <i>Bacillus cereus</i> (strain ATCC 14579 /<br>DSM 31 / JCM 2152 / NBRC 15305 / NCIMB 9373 /<br>NRRL B-3711) OX=226900 GN=BC_1953 PE=4 SV=1                                       |
| 14 | 1 | tr Q815G3 Q<br>815G3_BACC<br>R | 406  | 47551 | 22 | 18 | 3.5   | N-acetylmuramoyl-L-alanine amidase OS= <i>Bacillus</i><br><i>cereus</i> (strain ATCC 14579 / DSM 31 / JCM 2152 / NBRC<br>15305 / NCIMB 9373 / NRRL B-3711) OX=226900<br>GN=BC_5196 PE=4 SV=1      |
| 11 | 1 | tr Q81C32 Q<br>81C32_BACC<br>R | 572  | 55137 | 20 | 12 | 1.6   | Enterotoxin / cell-wall binding protein OS= <i>Bacillus</i><br><i>cereus</i> (strain ATCC 14579 / DSM 31 / JCM 2152 / NBRC<br>15305 / NCIMB 9373 / NRRL B-3711) OX=226900<br>GN=BC_2952 PE=4 SV=1 |



|    |   |                            |     |       |    |    |      |                                                                                                                                                                                                   |
|----|---|----------------------------|-----|-------|----|----|------|---------------------------------------------------------------------------------------------------------------------------------------------------------------------------------------------------|
| 12 | 1 | tr Q81BN1 Q81BN1_BACC<br>R | 566 | 57895 | 19 | 13 | 1.49 | 5'-nucleotidase OS= <i>Bacillus cereus</i> (strain ATCC 14579 / DSM 31 / JCM 2152 / NBRC 15305 / NCIMB 9373 / NRRL B-3711) OX=226900 GN=BC_3121 PE=3 SV=1                                         |
| 13 | 1 | tr Q81BS6 Q81BS6_BACC<br>R | 453 | 20592 | 19 | 12 | 9.34 | Signal peptidase I OS= <i>Bacillus cereus</i> (strain ATCC 14579 / DSM 31 / JCM 2152 / NBRC 15305 / NCIMB 9373 / NRRL B-3711) OX=226900 GN=BC_3070 PE=3 SV=1                                      |
| 17 | 1 | tr Q81HW1 Q81HW1_BA<br>CCR | 380 | 32367 | 19 | 10 | 3    | Phospholipase C OS= <i>Bacillus cereus</i> (strain ATCC 14579 / DSM 31 / JCM 2152 / NBRC 15305 / NCIMB 9373 / NRRL B-3711) OX=226900 GN=BC_0670 PE=4 SV=1                                         |
| 19 | 1 | tr Q81A32 Q81A32_BACC<br>R | 325 | 38089 | 19 | 9  | 2.97 | 1-phosphatidylinositol phosphodiesterase OS= <i>Bacillus cereus</i> (strain ATCC 14579 / DSM 31 / JCM 2152 / NBRC 15305 / NCIMB 9373 / NRRL B-3711) OX=226900 GN=BC_3761 PE=4 SV=1                |
| 15 | 1 | tr Q81CL9 Q81CL9_BACC<br>R | 403 | 62481 | 17 | 8  | 0.83 | Bacillolysin OS= <i>Bacillus cereus</i> (strain ATCC 14579 / DSM 31 / JCM 2152 / NBRC 15305 / NCIMB 9373 / NRRL B-3711) OX=226900 GN=BC_2735 PE=4 SV=1                                            |
| 12 | 2 | tr Q818Y6 Q818Y6_BACC<br>R | 391 | 57857 | 16 | 12 | 1.19 | 5'-nucleotidase OS= <i>Bacillus cereus</i> (strain ATCC 14579 / DSM 31 / JCM 2152 / NBRC 15305 / NCIMB 9373 / NRRL B-3711) OX=226900 GN=BC_4100 PE=3 SV=1                                         |
| 29 | 1 | tr Q81AN8 Q81AN8_BA<br>CCR | 196 | 45798 | 14 | 11 | 1.47 | Hemolysin II OS= <i>Bacillus cereus</i> (strain ATCC 14579 / DSM 31 / JCM 2152 / NBRC 15305 / NCIMB 9373 / NRRL B-3711) OX=226900 GN=BC_3523 PE=1 SV=1                                            |
| 16 | 1 | tr Q815D0 Q815D0_BACC<br>R | 388 | 60788 | 13 | 11 | 0.98 | N-acetylmuramoyl-L-alanine amidase OS= <i>Bacillus cereus</i> (strain ATCC 14579 / DSM 31 / JCM 2152 / NBRC 15305 / NCIMB 9373 / NRRL B-3711) OX=226900 GN=BC_5234 PE=4 SV=1                      |
| 18 | 1 | tr Q819K6 Q819K6_BACC<br>R | 341 | 49409 | 13 | 9  | 0.99 | Dihydrolipoyl dehydrogenase OS= <i>Bacillus cereus</i> (strain ATCC 14579 / DSM 31 / JCM 2152 / NBRC 15305 / NCIMB 9373 / NRRL B-3711) OX=226900 GN=BC_3970 PE=3 SV=1                             |
| 10 | 2 | tr Q81H34 Q81H34_BACC<br>R | 272 | 64559 | 13 | 12 | 1.02 | S-layer homology domain / putative murein endopeptidase OS= <i>Bacillus cereus</i> (strain ATCC 14579 / DSM 31 / JCM 2152 / NBRC 15305 / NCIMB 9373 / NRRL B-3711) OX=226900 GN=BC_0991 PE=4 SV=1 |

|    |   |                        |     |       |    |    |      |                                                                                                                                                                                       |
|----|---|------------------------|-----|-------|----|----|------|---------------------------------------------------------------------------------------------------------------------------------------------------------------------------------------|
| 31 | 1 | tr Q81HJ1 Q81HJ1_BACCR | 184 | 38925 | 13 | 10 | 2.18 | Periplasmic component of efflux system OS= <i>Bacillus cereus</i> (strain ATCC 14579 / DSM 31 / JCM 2152 / NBRC 15305 / NCIMB 9373 / NRRL B-3711) OX=226900 GN=BC_0816 PE=3 SV=1      |
| 28 | 1 | tr Q818I3 Q818I3_BACCR | 215 | 79573 | 12 | 11 | 0.69 | Penicillin-binding protein OS= <i>Bacillus cereus</i> (strain ATCC 14579 / DSM 31 / JCM 2152 / NBRC 15305 / NCIMB 9373 / NRRL B-3711) OX=226900 GN=BC_4270 PE=4 SV=1                  |
| 20 | 1 | tr Q81FF4 Q81FF4_BACCR | 316 | 48052 | 11 | 7  | 0.87 | Flagellar hook-associated protein 1 OS= <i>Bacillus cereus</i> (strain ATCC 14579 / DSM 31 / JCM 2152 / NBRC 15305 / NCIMB 9373 / NRRL B-3711) OX=226900 GN=BC_1636 PE=4 SV=1         |
| 23 | 1 | sp Q814C5 EFG_BACCR    | 257 | 76276 | 11 | 10 | 0.64 | Elongation factor G OS= <i>Bacillus cereus</i> (strain ATCC 14579 / DSM 31 / JCM 2152 / NBRC 15305 / NCIMB 9373 / NRRL B-3711) OX=226900 GN=fusA PE=3 SV=1                            |
| 24 | 1 | tr Q81IA3 Q81IA3_BACCR | 254 | 84627 | 10 | 7  | 0.5  | Formate acetyltransferase OS= <i>Bacillus cereus</i> (strain ATCC 14579 / DSM 31 / JCM 2152 / NBRC 15305 / NCIMB 9373 / NRRL B-3711) OX=226900 GN=BC_0491 PE=4 SV=1                   |
| 33 | 1 | tr Q81EK1 Q81EK1_BACCR | 176 | 37744 | 10 | 9  | 1.45 | Transcriptional regulator, LytR family OS= <i>Bacillus cereus</i> (strain ATCC 14579 / DSM 31 / JCM 2152 / NBRC 15305 / NCIMB 9373 / NRRL B-3711) OX=226900 GN=BC_1969 PE=4 SV=1      |
| 34 | 1 | tr Q817F4 Q817F4_BACCR | 171 | 62229 | 10 | 7  | 0.53 | Pyruvate kinase OS= <i>Bacillus cereus</i> (strain ATCC 14579 / DSM 31 / JCM 2152 / NBRC 15305 / NCIMB 9373 / NRRL B-3711) OX=226900 GN=BC_4599 PE=3 SV=1                             |
| 44 | 1 | tr Q81AR2 Q81AR2_BACCR | 126 | 35823 | 10 | 8  | 1.56 | Glycerophosphoryl diester phosphodiesterase OS= <i>Bacillus cereus</i> (strain ATCC 14579 / DSM 31 / JCM 2152 / NBRC 15305 / NCIMB 9373 / NRRL B-3711) OX=226900 GN=BC_3495 PE=4 SV=1 |
| 22 | 1 | tr Q81AG8 Q81AG8_BACCR | 260 | 43880 | 9  | 8  | 0.99 | Protease HhoA OS= <i>Bacillus cereus</i> (strain ATCC 14579 / DSM 31 / JCM 2152 / NBRC 15305 / NCIMB 9373 / NRRL B-3711) OX=226900 GN=BC_3600 PE=4 SV=1                               |

|    |   |                            |     |        |   |   |      |                                                                                                                                                                                                                                               |
|----|---|----------------------------|-----|--------|---|---|------|-----------------------------------------------------------------------------------------------------------------------------------------------------------------------------------------------------------------------------------------------|
| 26 | 1 | tr Q81CG6 Q81CG6_BACC<br>R | 228 | 49700  | 9 | 7 | 0.7  | Chitin binding protein OS= <i>Bacillus cereus</i> (strain ATCC 14579 / DSM 31 / JCM 2152 / NBRC 15305 / NCIMB 9373 / NRRL B-3711) OX=226900 GN=BC_2798 PE=4 SV=1                                                                              |
| 30 | 1 | tr Q81HU4 Q81HU4_BA<br>CCR | 195 | 56150  | 9 | 8 | 0.71 | IG hypothetical 22578 OS= <i>Bacillus cereus</i> (strain ATCC 14579 / DSM 31 / JCM 2152 / NBRC 15305 / NCIMB 9373 / NRRL B-3711) OX=226900 GN=BC_0687 PE=4 SV=1                                                                               |
| 11 | 3 | tr Q81HJ4 Q81HJ4_BACC<br>R | 151 | 45574  | 9 | 8 | 0.93 | Enterotoxin / cell-wall binding protein OS= <i>Bacillus cereus</i> (strain ATCC 14579 / DSM 31 / JCM 2152 / NBRC 15305 / NCIMB 9373 / NRRL B-3711) OX=226900 GN=BC_0813 PE=4 SV=1                                                             |
| 52 | 1 | tr Q7BYC7 Q7BYC7_BACC<br>R | 108 | 52307  | 9 | 9 | 0.91 | Hemolysin BL binding component OS= <i>Bacillus cereus</i> (strain ATCC 14579 / DSM 31 / JCM 2152 / NBRC 15305 / NCIMB 9373 / NRRL B-3711) OX=226900 GN=BC_3101 PE=4 SV=1                                                                      |
| 1  | 2 | tr Q81AN3 Q81AN3_BA<br>CCR | 102 | 109016 | 8 | 4 | 0.15 | Microbial collagenase OS= <i>Bacillus cereus</i> (strain ATCC 14579 / DSM 31 / JCM 2152 / NBRC 15305 / NCIMB 9373 / NRRL B-3711) OX=226900 GN=BC_3529 PE=4 SV=1                                                                               |
| 37 | 1 | tr Q81B73 Q81B73_BACC<br>R | 160 | 29277  | 7 | 5 | 0.89 | 6-aminohexanoate-dimer hydrolase OS= <i>Bacillus cereus</i> (strain ATCC 14579 / DSM 31 / JCM 2152 / NBRC 15305 / NCIMB 9373 / NRRL B-3711) OX=226900 GN=BC_3315 PE=4 SV=1                                                                    |
| 50 | 1 | tr Q81C49 Q81C49_BACC<br>R | 111 | 74607  | 7 | 7 | 0.43 | Phosphoglycerol transferase OS= <i>Bacillus cereus</i> (strain ATCC 14579 / DSM 31 / JCM 2152 / NBRC 15305 / NCIMB 9373 / NRRL B-3711) OX=226900 GN=BC_2932 PE=3 SV=1                                                                         |
| 36 | 1 | tr Q813P2 Q813P2_BACC<br>R | 163 | 16669  | 6 | 4 | 2.03 | Non-specific DNA-binding protein Dps / Iron-binding ferritin-like antioxidant protein / Ferroxidase OS= <i>Bacillus cereus</i> (strain ATCC 14579 / DSM 31 / JCM 2152 / NBRC 15305 / NCIMB 9373 / NRRL B-3711) OX=226900 GN=BC_2011 PE=3 SV=1 |
| 38 | 1 | tr Q81AM9 Q81AM9_BA<br>CCR | 154 | 31429  | 6 | 4 | 0.81 | Vancomycin B-type resistance protein vanW OS= <i>Bacillus cereus</i> (strain ATCC 14579 / DSM 31 / JCM 2152 / NBRC 15305 / NCIMB 9373 / NRRL B-3711) OX=226900 GN=BC_3533 PE=4 SV=1                                                           |

|    |   |                        |     |       |   |   |      |                                                                                                                                                                                   |
|----|---|------------------------|-----|-------|---|---|------|-----------------------------------------------------------------------------------------------------------------------------------------------------------------------------------|
| 39 | 1 | tr Q81FY1 Q81FY1_BACCR | 144 | 46755 | 6 | 4 | 0.38 | Cell wall endopeptidase, family M23/M37 OS= <i>Bacillus cereus</i> (strain ATCC 14579 / DSM 31 / JCM 2152 / NBRC 15305 / NCIMB 9373 / NRRL B-3711) OX=226900 GN=BC_1431 PE=4 SV=1 |
| 40 | 1 | tr Q81DA0 Q81DA0_BACCR | 144 | 33964 | 6 | 4 | 0.55 | Beta-lactamase OS= <i>Bacillus cereus</i> (strain ATCC 14579 / DSM 31 / JCM 2152 / NBRC 15305 / NCIMB 9373 / NRRL B-3711) OX=226900 GN=BC_2473 PE=3 SV=1                          |
| 41 | 1 | tr Q81FE1 Q81FE1_BACCR | 143 | 46203 | 6 | 4 | 0.5  | Flagellar hook protein FlgE OS= <i>Bacillus cereus</i> (strain ATCC 14579 / DSM 31 / JCM 2152 / NBRC 15305 / NCIMB 9373 / NRRL B-3711) OX=226900 GN=BC_1651 PE=3 SV=1             |
| 61 | 1 | tr Q815U2 Q815U2_BACCR | 69  | 60557 | 6 | 5 | 0.36 | Bacillolysin OS= <i>Bacillus cereus</i> (strain ATCC 14579 / DSM 31 / JCM 2152 / NBRC 15305 / NCIMB 9373 / NRRL B-3711) OX=226900 GN=BC_5036 PE=4 SV=1                            |

#### 9. *B. cereus* supernatant 70 kDa complex

| Family | Member | Accession              | Score | Mass   | Num. of Significant Matches | Num. of Significant Sequences | emPAI  | Description                                                                                                                                                             |
|--------|--------|------------------------|-------|--------|-----------------------------|-------------------------------|--------|-------------------------------------------------------------------------------------------------------------------------------------------------------------------------|
| 1      | 1      | Hbl_B                  | 6150  | 37838  | 186                         | 51                            | 514.23 | Hbl_B                                                                                                                                                                   |
| 2      | 1      | tr Q81I63 Q81I63_BACCR | 4551  | 109042 | 122                         | 42                            | 6.24   | Microbial collagenase OS= <i>Bacillus cereus</i> (strain ATCC 14579 / DSM 31 / JCM 2152 / NBRC 15305 / NCIMB 9373 / NRRL B-3711) OX=226900 GN=BC_0556 PE=4 SV=1         |
| 3      | 1      | tr Q815P0 Q815P0_BACCR | 3233  | 56561  | 86                          | 41                            | 26.89  | Thiol-activated cytolysin OS= <i>Bacillus cereus</i> (strain ATCC 14579 / DSM 31 / JCM 2152 / NBRC 15305 / NCIMB 9373 / NRRL B-3711) OX=226900 GN=BC_5101 PE=3 SV=1     |
| 5      | 1      | tr Q81BE4 Q81BE4_BACCR | 2164  | 43361  | 83                          | 50                            | 126.64 | Surface protein OS= <i>Bacillus cereus</i> (strain ATCC 14579 / DSM 31 / JCM 2152 / NBRC 15305 / NCIMB 9373 / NRRL B-3711) OX=226900 GN=BC_3221 PE=4 SV=1               |
| 8      | 1      | tr Q81EI5 Q81EI5_BACCR | 1780  | 43776  | 70                          | 18                            | 12.17  | Putative murein endopeptidase OS= <i>Bacillus cereus</i> (strain ATCC 14579 / DSM 31 / JCM 2152 / NBRC 15305 / NCIMB 9373 / NRRL B-3711) OX=226900 GN=BC_1991 PE=4 SV=1 |
| 4      | 1      | Hbl_L2                 | 2521  | 46140  | 67                          | 39                            | 41.37  | Hbl_L2                                                                                                                                                                  |

|    |   |                        |      |       |    |    |       |                                                                                                                                                                                                   |
|----|---|------------------------|------|-------|----|----|-------|---------------------------------------------------------------------------------------------------------------------------------------------------------------------------------------------------|
| 7  | 1 | tr Q815D2 Q815D2_BACCR | 1801 | 72036 | 51 | 26 | 4.94  | Phosphoglycerol transferase OS= <i>Bacillus cereus</i> (strain ATCC 14579 / DSM 31 / JCM 2152 / NBRC 15305 / NCIMB 9373 / NRRL B-3711) OX=226900 GN=BC_5232 PE=3 SV=1                             |
| 6  | 1 | Hbl_L1                 | 2078 | 40669 | 47 | 27 | 16.56 | Hbl_L1                                                                                                                                                                                            |
| 12 | 1 | tr Q81HW5 Q81HW5_BACCR | 1275 | 87818 | 42 | 27 | 2.64  | Immune inhibitor A OS= <i>Bacillus cereus</i> (strain ATCC 14579 / DSM 31 / JCM 2152 / NBRC 15305 / NCIMB 9373 / NRRL B-3711) OX=226900 GN=BC_0666 PE=4 SV=1                                      |
| 10 | 1 | tr Q81EL6 Q81EL6_BACCR | 1592 | 44980 | 39 | 16 | 3.51  | Enterotoxin OS= <i>Bacillus cereus</i> (strain ATCC 14579 / DSM 31 / JCM 2152 / NBRC 15305 / NCIMB 9373 / NRRL B-3711) OX=226900 GN=BC_1953 PE=4 SV=1                                             |
| 11 | 1 | tr Q81CL9 Q81CL9_BACCR | 1481 | 62481 | 39 | 14 | 1.96  | Bacillolysin OS= <i>Bacillus cereus</i> (strain ATCC 14579 / DSM 31 / JCM 2152 / NBRC 15305 / NCIMB 9373 / NRRL B-3711) OX=226900 GN=BC_2735 PE=4 SV=1                                            |
| 9  | 1 | tr Q81C49 Q81C49_BACCR | 1710 | 74607 | 38 | 20 | 2.55  | Phosphoglycerol transferase OS= <i>Bacillus cereus</i> (strain ATCC 14579 / DSM 31 / JCM 2152 / NBRC 15305 / NCIMB 9373 / NRRL B-3711) OX=226900 GN=BC_2932 PE=3 SV=1                             |
| 16 | 1 | sp Q814C5 EFG_BACCR    | 969  | 76276 | 34 | 21 | 2.45  | Elongation factor G OS= <i>Bacillus cereus</i> (strain ATCC 14579 / DSM 31 / JCM 2152 / NBRC 15305 / NCIMB 9373 / NRRL B-3711) OX=226900 GN=fusA PE=3 SV=1                                        |
| 18 | 1 | tr Q81HW1 Q81HW1_BACCR | 745  | 32367 | 33 | 15 | 7     | Phospholipase C OS= <i>Bacillus cereus</i> (strain ATCC 14579 / DSM 31 / JCM 2152 / NBRC 15305 / NCIMB 9373 / NRRL B-3711) OX=226900 GN=BC_0670 PE=4 SV=1                                         |
| 14 | 1 | tr Q81FF4 Q81FF4_BACCR | 1025 | 48052 | 32 | 15 | 3.79  | Flagellar hook-associated protein 1 OS= <i>Bacillus cereus</i> (strain ATCC 14579 / DSM 31 / JCM 2152 / NBRC 15305 / NCIMB 9373 / NRRL B-3711) OX=226900 GN=BC_1636 PE=4 SV=1                     |
| 8  | 2 | tr Q81H34 Q81H34_BACCR | 1007 | 64559 | 30 | 20 | 2.22  | S-layer homology domain / putative murein endopeptidase OS= <i>Bacillus cereus</i> (strain ATCC 14579 / DSM 31 / JCM 2152 / NBRC 15305 / NCIMB 9373 / NRRL B-3711) OX=226900 GN=BC_0991 PE=4 SV=1 |
| 15 | 1 | tr Q815U2 Q815U2_BACCR | 998  | 60557 | 29 | 20 | 2.69  | Bacillolysin OS= <i>Bacillus cereus</i> (strain ATCC 14579 / DSM 31 / JCM 2152 / NBRC 15305 / NCIMB 9373 / NRRL B-3711) OX=226900 GN=BC_5036 PE=4 SV=1                                            |

|    |   |                                |      |       |    |    |      |                                                                                                                                                                                   |
|----|---|--------------------------------|------|-------|----|----|------|-----------------------------------------------------------------------------------------------------------------------------------------------------------------------------------|
| 13 | 1 | tr Q81C32 Q<br>81C32_BACC<br>R | 1074 | 55137 | 28 | 13 | 2.19 | Enterotoxin / cell-wall binding protein OS= <i>Bacillus cereus</i> (strain ATCC 14579 / DSM 31 / JCM 2152 / NBRC 15305 / NCIMB 9373 / NRRL B-3711) OX=226900 GN=BC_2952 PE=4 SV=1 |
| 20 | 1 | tr Q81AN8 <br>Q81AN8_BA<br>CCR | 719  | 45798 | 23 | 18 | 3.75 | Hemolysin II OS= <i>Bacillus cereus</i> (strain ATCC 14579 / DSM 31 / JCM 2152 / NBRC 15305 / NCIMB 9373 / NRRL B-3711) OX=226900 GN=BC_3523 PE=1 SV=1                            |
| 19 | 1 | tr Q81BN1 Q<br>81BN1_BACC<br>R | 743  | 57895 | 21 | 15 | 1.65 | 5'-nucleotidase OS= <i>Bacillus cereus</i> (strain ATCC 14579 / DSM 31 / JCM 2152 / NBRC 15305 / NCIMB 9373 / NRRL B-3711) OX=226900 GN=BC_3121 PE=3 SV=1                         |
| 17 | 1 | tr Q81AG8 Q<br>81AG8_BACC<br>R | 770  | 43880 | 18 | 12 | 1.8  | Protease HhoA OS= <i>Bacillus cereus</i> (strain ATCC 14579 / DSM 31 / JCM 2152 / NBRC 15305 / NCIMB 9373 / NRRL B-3711) OX=226900 GN=BC_3600 PE=4 SV=1                           |
| 22 | 1 | tr Q81FZ5 Q<br>81FZ5_BACC<br>R | 649  | 72235 | 18 | 12 | 0.87 | Phosphoglycerol transferase OS= <i>Bacillus cereus</i> (strain ATCC 14579 / DSM 31 / JCM 2152 / NBRC 15305 / NCIMB 9373 / NRRL B-3711) OX=226900 GN=BC_1417 PE=3 SV=1             |
| 23 | 1 | tr Q814T5 Q<br>814T5_BACC<br>R | 575  | 30653 | 18 | 10 | 3.33 | Fructose-bisphosphate aldolase OS= <i>Bacillus cereus</i> (strain ATCC 14579 / DSM 31 / JCM 2152 / NBRC 15305 / NCIMB 9373 / NRRL B-3711) OX=226900 GN=BC_5335 PE=4 SV=1          |
| 19 | 2 | tr Q818Y6 Q<br>818Y6_BACC<br>R | 519  | 57857 | 16 | 10 | 1.05 | 5'-nucleotidase OS= <i>Bacillus cereus</i> (strain ATCC 14579 / DSM 31 / JCM 2152 / NBRC 15305 / NCIMB 9373 / NRRL B-3711) OX=226900 GN=BC_4100 PE=3 SV=1                         |
| 50 | 1 | tr Q815G3 Q<br>815G3_BACC<br>R | 223  | 47551 | 16 | 12 | 1.8  | N-acetylmuramoyl-L-alanine amidase OS= <i>Bacillus cereus</i> (strain ATCC 14579 / DSM 31 / JCM 2152 / NBRC 15305 / NCIMB 9373 / NRRL B-3711) OX=226900 GN=BC_5196 PE=4 SV=1      |
| 21 | 1 | sp Q812X3 E<br>FTS_BACCR       | 651  | 32459 | 15 | 12 | 3    | Elongation factor Ts OS= <i>Bacillus cereus</i> (strain ATCC 14579 / DSM 31 / JCM 2152 / NBRC 15305 / NCIMB 9373 / NRRL B-3711) OX=226900 GN=tsf PE=3 SV=1                        |
| 24 | 1 | tr Q815D0 Q<br>815D0_BACC<br>R | 488  | 60788 | 15 | 11 | 1.1  | N-acetylmuramoyl-L-alanine amidase OS= <i>Bacillus cereus</i> (strain ATCC 14579 / DSM 31 / JCM 2152 / NBRC 15305 / NCIMB 9373 / NRRL B-3711) OX=226900 GN=BC_5234 PE=4 SV=1      |

|    |   |                        |     |       |    |    |      |                                                                                                                                                                                    |
|----|---|------------------------|-----|-------|----|----|------|------------------------------------------------------------------------------------------------------------------------------------------------------------------------------------|
| 33 | 1 | sp Q815K8 ENO_BACCR    | 354 | 46343 | 15 | 12 | 1.65 | Enolase OS= <i>Bacillus cereus</i> (strain ATCC 14579 / DSM 31 / JCM 2152 / NBRC 15305 / NCIMB 9373 / NRRL B-3711) OX=226900 GN=eno PE=3 SV=1                                      |
| 1  | 2 | tr Q7BYC7 Q7BYC7_BACCR | 264 | 52307 | 14 | 13 | 1.55 | Hemolysin BL binding component OS= <i>Bacillus cereus</i> (strain ATCC 14579 / DSM 31 / JCM 2152 / NBRC 15305 / NCIMB 9373 / NRRL B-3711) OX=226900 GN=BC_3101 PE=4 SV=1           |
| 30 | 1 | tr Q81A32 Q81A32_BACCR | 424 | 38089 | 13 | 7  | 1.96 | 1-phosphatidylinositol phosphodiesterase OS= <i>Bacillus cereus</i> (strain ATCC 14579 / DSM 31 / JCM 2152 / NBRC 15305 / NCIMB 9373 / NRRL B-3711) OX=226900 GN=BC_3761 PE=4 SV=1 |
| 32 | 1 | tr Q81HU4 Q81HU4_BACCR | 354 | 56150 | 13 | 12 | 1.39 | IG hypothetical 22578 OS= <i>Bacillus cereus</i> (strain ATCC 14579 / DSM 31 / JCM 2152 / NBRC 15305 / NCIMB 9373 / NRRL B-3711) OX=226900 GN=BC_0687 PE=4 SV=1                    |
| 36 | 1 | tr Q81EK1 Q81EK1_BACCR | 329 | 37744 | 13 | 10 | 1.7  | Transcriptional regulator, LytR family OS= <i>Bacillus cereus</i> (strain ATCC 14579 / DSM 31 / JCM 2152 / NBRC 15305 / NCIMB 9373 / NRRL B-3711) OX=226900 GN=BC_1969 PE=4 SV=1   |
| 25 | 1 | tr Q819K6 Q819K6_BACCR | 457 | 49409 | 12 | 9  | 0.99 | Dihydrolipoyl dehydrogenase OS= <i>Bacillus cereus</i> (strain ATCC 14579 / DSM 31 / JCM 2152 / NBRC 15305 / NCIMB 9373 / NRRL B-3711) OX=226900 GN=BC_3970 PE=3 SV=1              |
| 29 | 1 | tr Q815C5 Q815C5_BACCR | 427 | 31221 | 12 | 6  | 1.61 | Enterotoxin / cell-wall binding protein OS= <i>Bacillus cereus</i> (strain ATCC 14579 / DSM 31 / JCM 2152 / NBRC 15305 / NCIMB 9373 / NRRL B-3711) OX=226900 GN=BC_5239 PE=4 SV=1  |
| 42 | 1 | tr Q81HJ1 Q81HJ1_BACCR | 281 | 38925 | 12 | 10 | 1.62 | Periplasmic component of efflux system OS= <i>Bacillus cereus</i> (strain ATCC 14579 / DSM 31 / JCM 2152 / NBRC 15305 / NCIMB 9373 / NRRL B-3711) OX=226900 GN=BC_0816 PE=3 SV=1   |
| 45 | 1 | tr Q81BS6 Q81BS6_BACCR | 250 | 20592 | 12 | 10 | 5.03 | Signal peptidase I OS= <i>Bacillus cereus</i> (strain ATCC 14579 / DSM 31 / JCM 2152 / NBRC 15305 / NCIMB 9373 / NRRL B-3711) OX=226900 GN=BC_3070 PE=3 SV=1                       |

|    |   |                        |     |       |    |   |      |                                                                                                                                                                                         |
|----|---|------------------------|-----|-------|----|---|------|-----------------------------------------------------------------------------------------------------------------------------------------------------------------------------------------|
| 46 | 1 | tr Q81HV2 Q81HV2_BACCR | 248 | 47290 | 12 | 8 | 1.05 | Cell wall-binding protein OS= <i>Bacillus cereus</i> (strain ATCC 14579 / DSM 31 / JCM 2152 / NBRC 15305 / NCIMB 9373 / NRRL B-3711) OX=226900 GN=BC_0679 PE=4 SV=1                     |
| 26 | 1 | sp Q818E9 DNAK_BACCR   | 445 | 65726 | 11 | 9 | 0.68 | Chaperone protein DnaK OS= <i>Bacillus cereus</i> (strain ATCC 14579 / DSM 31 / JCM 2152 / NBRC 15305 / NCIMB 9373 / NRRL B-3711) OX=226900 GN=dnaK PE=3 SV=1                           |
| 44 | 1 | tr Q818I3 Q818I3_BACCR | 259 | 79573 | 11 | 8 | 0.61 | Penicillin-binding protein OS= <i>Bacillus cereus</i> (strain ATCC 14579 / DSM 31 / JCM 2152 / NBRC 15305 / NCIMB 9373 / NRRL B-3711) OX=226900 GN=BC_4270 PE=4 SV=1                    |
| 27 | 1 | tr Q81HW0 Q81HW0_BACCR | 431 | 36900 | 10 | 6 | 0.84 | Sphingomyelin phosphodiesterase OS= <i>Bacillus cereus</i> (strain ATCC 14579 / DSM 31 / JCM 2152 / NBRC 15305 / NCIMB 9373 / NRRL B-3711) OX=226900 GN=BC_0671 PE=4 SV=1               |
| 39 | 1 | tr Q81AM9 Q81AM9_BACCR | 304 | 31429 | 10 | 8 | 1.92 | Vancomycin B-type resistance protein vanW OS= <i>Bacillus cereus</i> (strain ATCC 14579 / DSM 31 / JCM 2152 / NBRC 15305 / NCIMB 9373 / NRRL B-3711) OX=226900 GN=BC_3533 PE=4 SV=1     |
| 40 | 1 | tr Q815H1 Q815H1_BACCR | 292 | 52395 | 10 | 9 | 0.91 | Tail-specific protease OS= <i>Bacillus cereus</i> (strain ATCC 14579 / DSM 31 / JCM 2152 / NBRC 15305 / NCIMB 9373 / NRRL B-3711) OX=226900 GN=BC_5184 PE=3 SV=1                        |
| 31 | 1 | tr Q81C52 Q81C52_BACCR | 414 | 30805 | 9  | 8 | 1.98 | Peptidoglycan N-acetylglucosamine deacetylase OS= <i>Bacillus cereus</i> (strain ATCC 14579 / DSM 31 / JCM 2152 / NBRC 15305 / NCIMB 9373 / NRRL B-3711) OX=226900 GN=BC_2929 PE=4 SV=1 |
| 43 | 1 | tr Q81A13 Q81A13_BACCR | 260 | 33571 | 9  | 7 | 1.19 | Transcriptional regulator OS= <i>Bacillus cereus</i> (strain ATCC 14579 / DSM 31 / JCM 2152 / NBRC 15305 / NCIMB 9373 / NRRL B-3711) OX=226900 GN=BC_3782 PE=4 SV=1                     |
| 49 | 1 | sp Q819X9 RS2_BACCR    | 227 | 26546 | 9  | 7 | 2.08 | 30S ribosomal protein S2 OS= <i>Bacillus cereus</i> (strain ATCC 14579 / DSM 31 / JCM 2152 / NBRC 15305 / NCIMB 9373 / NRRL B-3711) OX=226900 GN=rpsB PE=3 SV=1                         |



|    |   |                        |     |       |   |   |      |                                                                                                                                                                                   |
|----|---|------------------------|-----|-------|---|---|------|-----------------------------------------------------------------------------------------------------------------------------------------------------------------------------------|
| 58 | 1 | tr Q81FD2 Q81FD2_BACCR | 176 | 28055 | 9 | 7 | 1.9  | Soluble lytic murein transglycosylase OS= <i>Bacillus cereus</i> (strain ATCC 14579 / DSM 31 / JCM 2152 / NBRC 15305 / NCIMB 9373 / NRRL B-3711) OX=226900 GN=BC_1660 PE=4 SV=1   |
| 34 | 1 | tr Q81IA3 Q81IA3_BACCR | 352 | 84627 | 8 | 6 | 0.37 | Formate acetyltransferase OS= <i>Bacillus cereus</i> (strain ATCC 14579 / DSM 31 / JCM 2152 / NBRC 15305 / NCIMB 9373 / NRRL B-3711) OX=226900 GN=BC_0491 PE=4 SV=1               |
| 38 | 1 | tr Q81FL5 Q81FL5_BACCR | 314 | 58924 | 8 | 6 | 0.47 | Metal-dependent carboxypeptidase OS= <i>Bacillus cereus</i> (strain ATCC 14579 / DSM 31 / JCM 2152 / NBRC 15305 / NCIMB 9373 / NRRL B-3711) OX=226900 GN=BC_1566 PE=3 SV=1        |
| 29 | 2 | tr Q81HJ4 Q81HJ4_BACCR | 288 | 45574 | 8 | 8 | 0.93 | Enterotoxin / cell-wall binding protein OS= <i>Bacillus cereus</i> (strain ATCC 14579 / DSM 31 / JCM 2152 / NBRC 15305 / NCIMB 9373 / NRRL B-3711) OX=226900 GN=BC_0813 PE=4 SV=1 |
| 51 | 1 | tr Q817M4 Q817M4_BACCR | 223 | 29372 | 8 | 3 | 0.66 | D-alanyl-D-alanine carboxypeptidase OS= <i>Bacillus cereus</i> (strain ATCC 14579 / DSM 31 / JCM 2152 / NBRC 15305 / NCIMB 9373 / NRRL B-3711) OX=226900 GN=BC_4514 PE=4 SV=1     |
| 54 | 1 | tr Q81HR4 Q81HR4_BACCR | 189 | 42120 | 8 | 6 | 0.71 | Cell wall endopeptidase, family M23/M37 OS= <i>Bacillus cereus</i> (strain ATCC 14579 / DSM 31 / JCM 2152 / NBRC 15305 / NCIMB 9373 / NRRL B-3711) OX=226900 GN=BC_0740 PE=4 SV=1 |
| 35 | 1 | tr Q81FY1 Q81FY1_BACCR | 333 | 46755 | 7 | 5 | 0.5  | Cell wall endopeptidase, family M23/M37 OS= <i>Bacillus cereus</i> (strain ATCC 14579 / DSM 31 / JCM 2152 / NBRC 15305 / NCIMB 9373 / NRRL B-3711) OX=226900 GN=BC_1431 PE=4 SV=1 |
| 47 | 1 | sp Q816G0 G6PI_BACCR   | 231 | 50280 | 7 | 7 | 0.69 | Glucose-6-phosphate isomerase OS= <i>Bacillus cereus</i> (strain ATCC 14579 / DSM 31 / JCM 2152 / NBRC 15305 / NCIMB 9373 / NRRL B-3711) OX=226900 GN=pgi PE=3 SV=1               |
| 52 | 1 | tr Q813P2 Q813P2_BACCR | 212 | 16669 | 7 | 3 | 2.03 | Non-specific DNA-binding protein Dps / Iron-binding ferritin-like antioxidant protein / Ferroxidase OS= <i>Bacillus cereus</i> (strain ATCC 14579 / DSM 31 / JCM                  |

|    |   |                                |     |       |   |   |      |                                                                                                                                                                                                                   |
|----|---|--------------------------------|-----|-------|---|---|------|-------------------------------------------------------------------------------------------------------------------------------------------------------------------------------------------------------------------|
|    |   |                                |     |       |   |   |      | 2152 / NBRC 15305 / NCIMB 9373 / NRRL B-3711)<br>OX=226900 GN=BC_2011 PE=3 SV=1                                                                                                                                   |
| 55 | 1 | sp Q819J5 D<br>APH_BACCR       | 180 | 25689 | 7 | 5 | 1.39 | 2,3,4,5-tetrahydropyridine-2,6-dicarboxylate N-<br>acetyltransferase OS= <i>Bacillus cereus</i> (strain ATCC 14579<br>/ DSM 31 / JCM 2152 / NBRC 15305 / NCIMB 9373 /<br>NRRL B-3711) OX=226900 GN=dapH PE=3 SV=1 |
| 56 | 1 | tr Q81DC9 Q<br>81DC9_BACC<br>R | 177 | 54545 | 7 | 7 | 0.62 | Aminoacyl-histidine dipeptidase OS= <i>Bacillus cereus</i><br>(strain ATCC 14579 / DSM 31 / JCM 2152 / NBRC 15305<br>/ NCIMB 9373 / NRRL B-3711) OX=226900 GN=BC_2439<br>PE=4 SV=1                                |
| 62 | 1 | tr Q81HK5 Q<br>81HK5_BAC<br>CR | 163 | 45535 | 7 | 6 | 0.64 | Transcriptional regulator, LytR family OS= <i>Bacillus</i><br><i>cereus</i> (strain ATCC 14579 / DSM 31 / JCM 2152 / NBRC<br>15305 / NCIMB 9373 / NRRL B-3711) OX=226900<br>GN=BC_0801 PE=4 SV=1                  |
| 75 | 1 | tr Q81FF2 Q<br>81FF2_BACC<br>R | 120 | 50659 | 7 | 2 | 0.25 | Flagellar hook-associated protein 2 OS= <i>Bacillus cereus</i><br>(strain ATCC 14579 / DSM 31 / JCM 2152 / NBRC 15305<br>/ NCIMB 9373 / NRRL B-3711) OX=226900 GN=BC_1638<br>PE=3 SV=1                            |
| 41 | 1 | tr Q815K6 Q<br>815K6_BACC<br>R | 284 | 35176 | 6 | 4 | 0.7  | Glyceraldehyde-3-phosphate dehydrogenase<br>OS= <i>Bacillus cereus</i> (strain ATCC 14579 / DSM 31 / JCM<br>2152 / NBRC 15305 / NCIMB 9373 / NRRL B-3711)<br>OX=226900 GN=BC_5140 PE=3 SV=1                       |
| 53 | 1 | tr Q81E10 Q<br>81E10_BACC<br>R | 194 | 22165 | 6 | 4 | 0.95 | Uncharacterized protein OS= <i>Bacillus cereus</i> (strain<br>ATCC 14579 / DSM 31 / JCM 2152 / NBRC 15305 /<br>NCIMB 9373 / NRRL B-3711) OX=226900 GN=BC_2186<br>PE=4 SV=1                                        |
| 57 | 1 | sp Q81J39 R<br>L2_BACCR        | 177 | 30260 | 6 | 6 | 1.1  | 50S ribosomal protein L2 OS= <i>Bacillus cereus</i> (strain<br>ATCC 14579 / DSM 31 / JCM 2152 / NBRC 15305 /<br>NCIMB 9373 / NRRL B-3711) OX=226900 GN=rplB PE=3<br>SV=1                                          |
| 66 | 1 | sp Q81GI3 F<br>ABI_BACCR       | 146 | 27723 | 6 | 5 | 0.96 | Enoyl-[acyl-carrier-protein] reductase [NADH] FabI<br>OS= <i>Bacillus cereus</i> (strain ATCC 14579 / DSM 31 / JCM<br>2152 / NBRC 15305 / NCIMB 9373 / NRRL B-3711)<br>OX=226900 GN=fabI PE=1 SV=1                |

|    |   |                        |     |        |   |   |      |                                                                                                                                                                                                              |
|----|---|------------------------|-----|--------|---|---|------|--------------------------------------------------------------------------------------------------------------------------------------------------------------------------------------------------------------|
| 65 | 1 | tr Q81CG6 Q81CG6_BACCR | 146 | 49700  | 6 | 5 | 0.46 | Chitin binding protein OS= <i>Bacillus cereus</i> (strain ATCC 14579 / DSM 31 / JCM 2152 / NBRC 15305 / NCIMB 9373 / NRRL B-3711) OX=226900 GN=BC_2798 PE=4 SV=1                                             |
| 2  | 2 | tr Q81AN3 Q81AN3_BACCR | 120 | 109016 | 6 | 4 | 0.15 | Microbial collagenase OS= <i>Bacillus cereus</i> (strain ATCC 14579 / DSM 31 / JCM 2152 / NBRC 15305 / NCIMB 9373 / NRRL B-3711) OX=226900 GN=BC_3529 PE=4 SV=1                                              |
| 76 | 1 | tr Q81IX8 Q81IX8_BACCR | 119 | 61463  | 6 | 5 | 0.36 | Oligopeptide-binding protein oppA OS= <i>Bacillus cereus</i> (strain ATCC 14579 / DSM 31 / JCM 2152 / NBRC 15305 / NCIMB 9373 / NRRL B-3711) OX=226900 GN=BC_0216 PE=4 SV=1                                  |
| 79 | 1 | sp Q816T0 SYL_BACCR    | 113 | 91296  | 6 | 6 | 0.28 | Leucine--tRNA ligase OS= <i>Bacillus cereus</i> (strain ATCC 14579 / DSM 31 / JCM 2152 / NBRC 15305 / NCIMB 9373 / NRRL B-3711) OX=226900 GN=leuS PE=3 SV=1                                                  |
| 61 | 1 | tr Q81A83 Q81A83_BACCR | 168 | 36228  | 5 | 5 | 0.68 | Antigen OS= <i>Bacillus cereus</i> (strain ATCC 14579 / DSM 31 / JCM 2152 / NBRC 15305 / NCIMB 9373 / NRRL B-3711) OX=226900 GN=BC_3699 PE=4 SV=1                                                            |
| 63 | 1 | sp Q819H7 METE_BACCR   | 157 | 87131  | 5 | 5 | 0.24 | 5-methyltetrahydropteroyltriglutamate--homocysteine methyltransferase OS= <i>Bacillus cereus</i> (strain ATCC 14579 / DSM 31 / JCM 2152 / NBRC 15305 / NCIMB 9373 / NRRL B-3711) OX=226900 GN=metE PE=3 SV=1 |
| 73 | 1 | sp P60180 TPIS_BACCR   | 125 | 26452  | 5 | 4 | 1.03 | Triosephosphate isomerase OS= <i>Bacillus cereus</i> (strain ATCC 14579 / DSM 31 / JCM 2152 / NBRC 15305 / NCIMB 9373 / NRRL B-3711) OX=226900 GN=tpiA PE=5 SV=1                                             |
| 74 | 1 | sp Q81J61 SYE_BACCR    | 120 | 55669  | 5 | 4 | 0.31 | Glutamate--tRNA ligase OS= <i>Bacillus cereus</i> (strain ATCC 14579 / DSM 31 / JCM 2152 / NBRC 15305 / NCIMB 9373 / NRRL B-3711) OX=226900 GN=gltx PE=3 SV=2                                                |

#### 10. rHbl 440 kDa complex

| Family | Member | Accession | Score | Mass  | Num. of Significant Matches | Num. of Significant Sequences | emPAI  | Description |
|--------|--------|-----------|-------|-------|-----------------------------|-------------------------------|--------|-------------|
| 3      | 1      | Hbl_B     | 2288  | 37838 | 130                         | 33                            | 83.93  | Hbl_B       |
| 1      | 1      | Hbl_L2    | 3117  | 46140 | 127                         | 52                            | 341.64 | Hbl_L2      |
| 2      | 1      | Hbl_L1    | 2523  | 40669 | 119                         | 35                            | 104.54 | Hbl_L1      |

| 2                               | 2      | tr Q7BYC6 Q7BYC6_BACCR | 2196  | 43804 | 93                          | 35                            | 37.4   | Hemolysin BL lytic component L1 OS= <i>Bacillus cereus</i> (strain ATCC 14579 / DSM 31 / JCM 2152 / NBRC 15305 / NCIMB 9373 / NRRL B-3711) OX=226900 GN=BC_3103 PE=4 SV=1 |
|---------------------------------|--------|------------------------|-------|-------|-----------------------------|-------------------------------|--------|---------------------------------------------------------------------------------------------------------------------------------------------------------------------------|
| <b>11. rHbl 300 kDa complex</b> |        |                        |       |       |                             |                               |        |                                                                                                                                                                           |
| Family                          | Member | Accession              | Score | Mass  | Num. of Significant Matches | Num. of Significant Sequences | emPAI  | Description                                                                                                                                                               |
| 2                               | 1      | Hbl_B                  | 1220  | 37838 | 116                         | 34                            | 83.93  | Hbl_B                                                                                                                                                                     |
| 1                               | 1      | Hbl_L2                 | 1392  | 46140 | 84                          | 38                            | 59.58  | Hbl_L2                                                                                                                                                                    |
| 3                               | 1      | Hbl_L1                 | 1062  | 40669 | 71                          | 30                            | 40.57  | Hbl_L1                                                                                                                                                                    |
| 3                               | 2      | tr Q7BYC6 Q7BYC6_BACCR | 874   | 43804 | 57                          | 27                            | 15.19  | Hemolysin BL lytic component L1 OS= <i>Bacillus cereus</i> (strain ATCC 14579 / DSM 31 / JCM 2152 / NBRC 15305 / NCIMB 9373 / NRRL B-3711) OX=226900 GN=BC_3103 PE=4 SV=1 |
| <b>12. rHbl 200 kDa complex</b> |        |                        |       |       |                             |                               |        |                                                                                                                                                                           |
| Family                          | Member | Accession              | Score | Mass  | Num. of Significant Matches | Num. of Significant Sequences | emPAI  | Description                                                                                                                                                               |
| 1                               | 1      | Hbl_L2                 | 3537  | 46140 | 167                         | 61                            | 351.31 | Hbl_L2                                                                                                                                                                    |
| 2                               | 1      | Hbl_B                  | 2989  | 37838 | 165                         | 53                            | 381.85 | Hbl_B                                                                                                                                                                     |
| 3                               | 1      | Hbl_L1                 | 1823  | 40669 | 81                          | 38                            | 91.72  | Hbl_L1                                                                                                                                                                    |
| 3                               | 2      | tr Q7BYC6 Q7BYC6_BACCR | 1367  | 43804 | 63                          | 34                            | 29.85  | Hemolysin BL lytic component L1 OS= <i>Bacillus cereus</i> (strain ATCC 14579 / DSM 31 / JCM 2152 / NBRC 15305 / NCIMB 9373 / NRRL B-3711) OX=226900 GN=BC_3103 PE=4 SV=1 |

**Table S2.** Overview of LC-MS experiments. The mass spectrometry proteomics data have been deposited to the ProteomeXchange Consortium [66] via the PRIDE [67] partner repository with the dataset identifier PXD021720.

| <b>Band No</b>               | <b>Approx. Size (kDa)</b> | <b>Raw Data Name</b> | <b>Measurement</b> |
|------------------------------|---------------------------|----------------------|--------------------|
| <i>B. cereus</i> supernatant |                           |                      |                    |
| 1                            | 700                       | KS 669               | No 976 07.02.2020  |
| 2                            | 600                       | KS 440-669           | No 976 07.02.2020  |
| 3                            | 440                       | KS 440               | No 976 07.02.2020  |
| 7                            | 120                       | KS below 140         | No 946 03.12.2019  |
| 9                            | 70                        | KS 66                | No 946 03.12.2019  |
| rHbl                         |                           |                      |                    |
| 10                           | 440                       | Hbl 440              | No 976 07.02.2020  |
| 11                           | 300                       | Hbl 232-440          | No 976 07.02.2020  |
| 12                           | 200                       | rHbl 140-232         | No 946 03.12.2019  |
